# Supplementary material for: Three-dimensional superhydrophobic surface-enhanced Raman spectroscopy substrate for sensitive detection of pollutants in real environments
Source: Royal Society of Chemistry journal article supplement (doi:10.1039/c4ta06590e), 2015-01-01
Supplement: c4ta06590e1.pdf [file c4ta06590e1.pdf]

## Supporting Information

Hongyue Zhao,<sup>1</sup> Jing Jin,<sup>1</sup> Weijun Tian,<sup>2</sup> Ran Li,<sup>1</sup> Zhi Yu,<sup>2</sup> Wei Song,<sup>1\*</sup> Qian

Cong,<sup>2</sup> Bing Zhao,<sup>1</sup> Yukihiro Ozaki<sup>3</sup>

*1. State Key Laboratory of Supramolecular Structure and Materials, Jilin University;*

*2699#, Qianjin Street, Changchun 130012, P. R. China*

*2. Key Laboratory for Bionic Engineering Ministry of Education, Jilin University,*

*5988# Renmin Street, Changchun 130025, P.R. China*

*3. School of Science and Technology, Kwansai Gakuin University, 2-1 Gakuen, Sanda,*

*Hyogo 660-1337, Japan*

\* Corresponding author: [weisong@jlu.edu.cn](mailto:weisong@jlu.edu.cn)

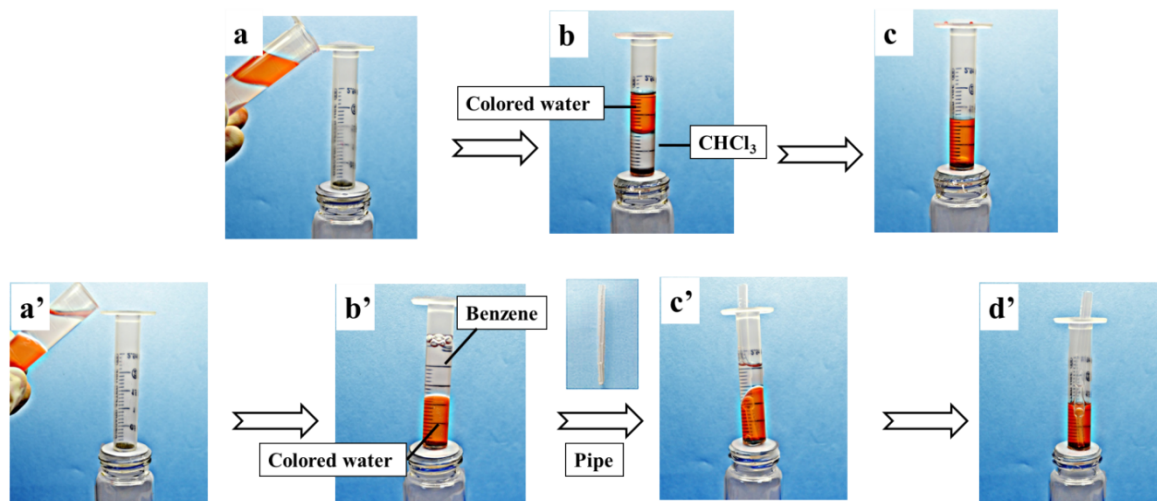

**Figure S1.** Oil-water separation of the 3D Au NPs/nickel foam. The as-prepared 3D Au NPs/nickel foam was placed in the bottom of the syringe. (a)-(c) chloroform/water separation experiment (water at the top of the syringe); (a')-(c') benzene/water separation experiment (water at the bottom of the syringe).

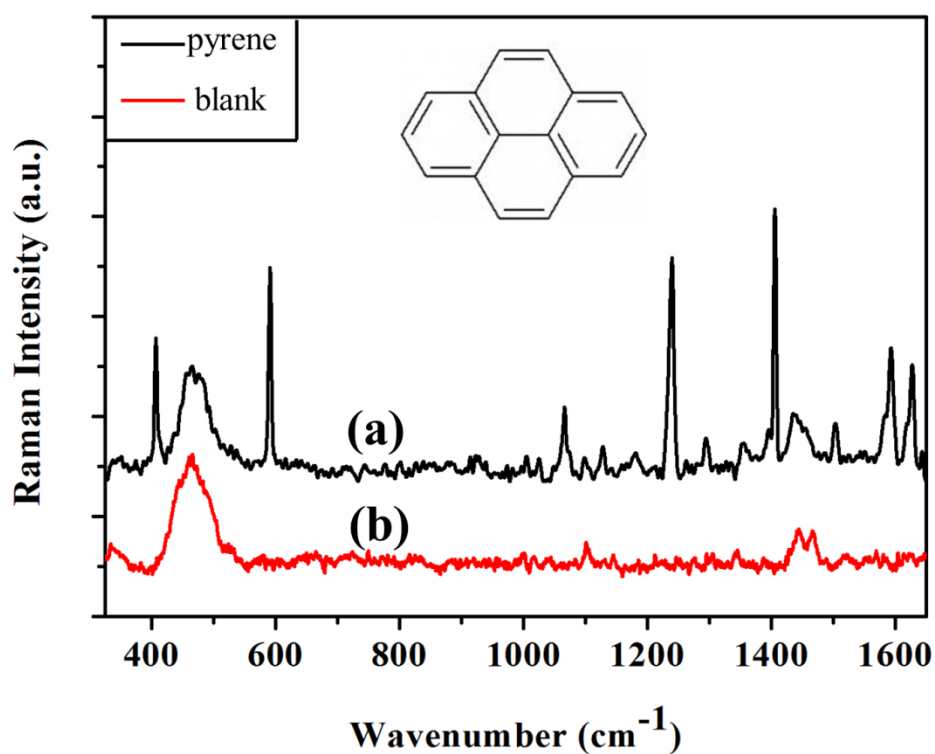

**Figure S2.** (a) A SERS spectrum of  $10^{-3}$  M pyrene on the 1-octadecanethiol modified 3D Au NPs/nickel foam substrate and (b) a Raman spectrum of 1-octadecanethiol modified 3D Au NPs/nickel foam substrate.

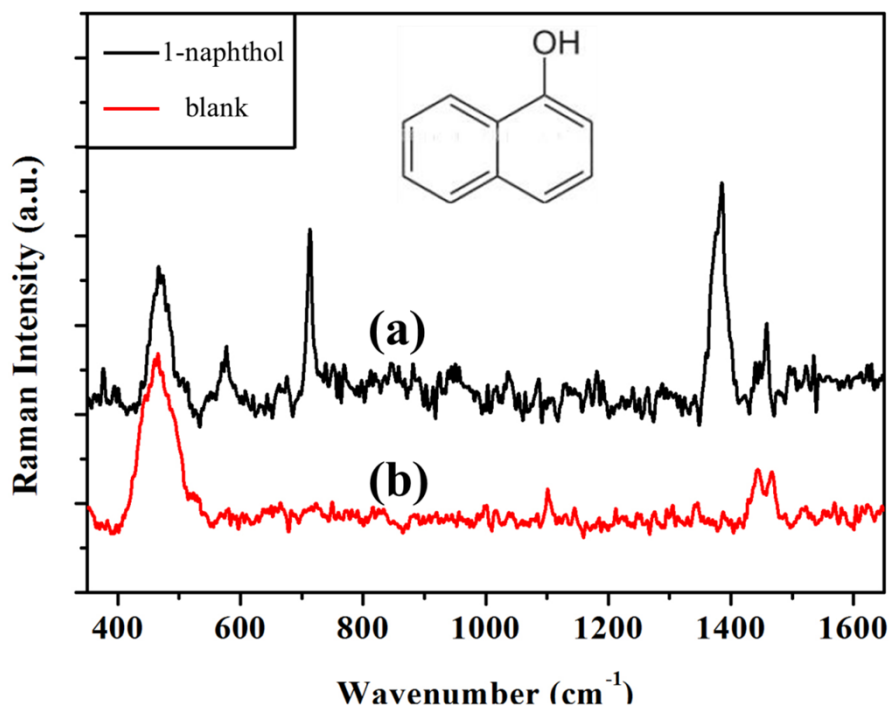

**Figure S3.** (a) A SERS spectrum of  $10^{-3}$  M 1-naphthol on the 1-octadecanethiol modified 3D Au NPs/nickel foam substrate and (b) a Raman spectrum of 1-octadecanethiol modified 3D Au NPs/nickel foam substrate.

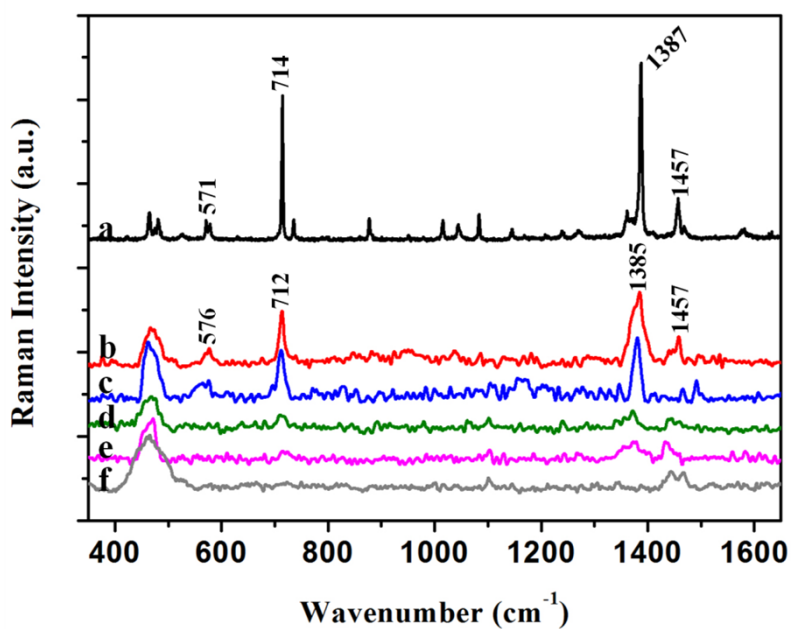

**Figure S4.** (a) A Raman spectrum of 1-naphthol solid powder, (b)-(e) SERS spectra of 1-naphthol with different concentrations by using the modified substrates:  $10^{-3}$ ,  $10^{-4}$ ,  $10^{-5}$  and  $10^{-6}$  M, (f) A Raman spectrum of the modified substrate without 1-naphthol.

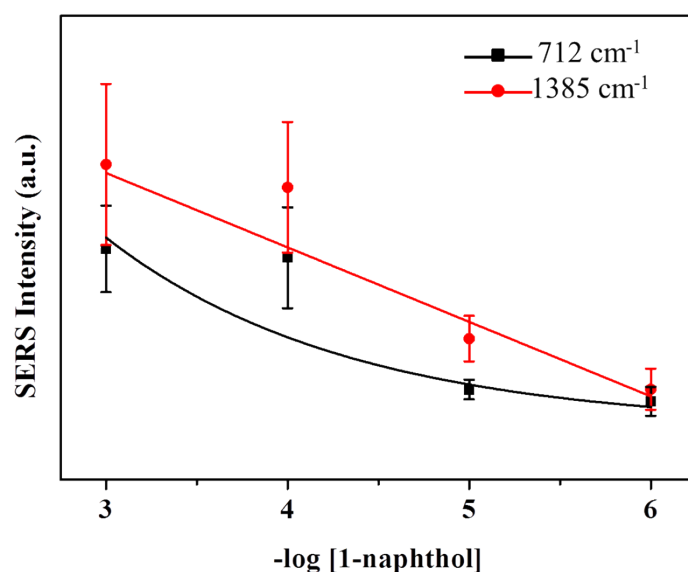

**Figure S5.** SERS intensity at 1385 and 712  $\text{cm}^{-1}$  versus the concentration of pyrene on the 1-octadecanethiol modified 3D Au NPs/nickel foam substrate. Each error bar means the standard deviation at five different detected positions randomly.

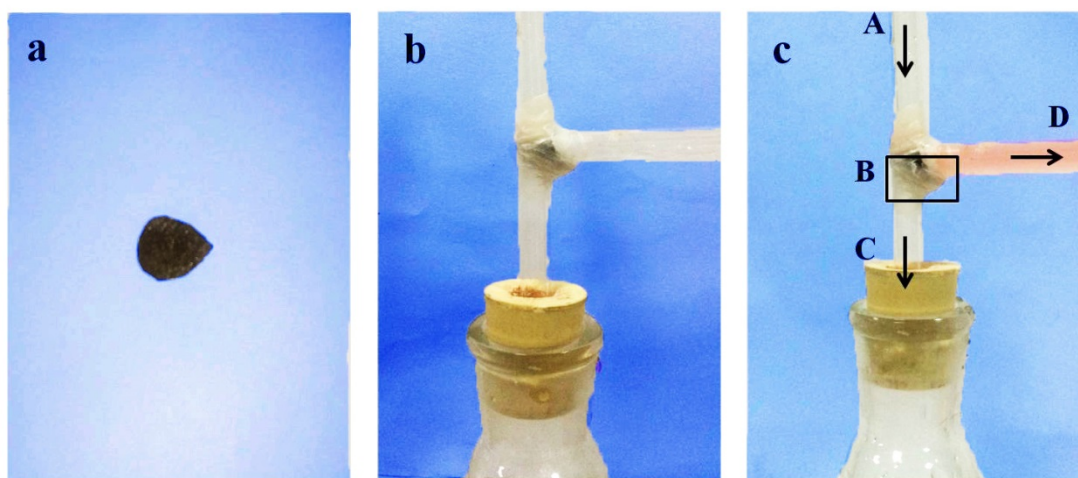

**Figure S6.** (a) The photograph of the 3D hydrophobic SERS substrate. (b) The simple oil-water separation device of the 3D hydrophobic SERS substrate. (c) The process of the adsorption of PAHs using the simple oil-water separation device for the detection of PAHs. A stands for the entrance of the analytes; B stands for the position of the 3D hydrophobic SERS substrate; C stand for the exit of organic solvents; D stands for the exit of aqueous solution with salt or contaminant.

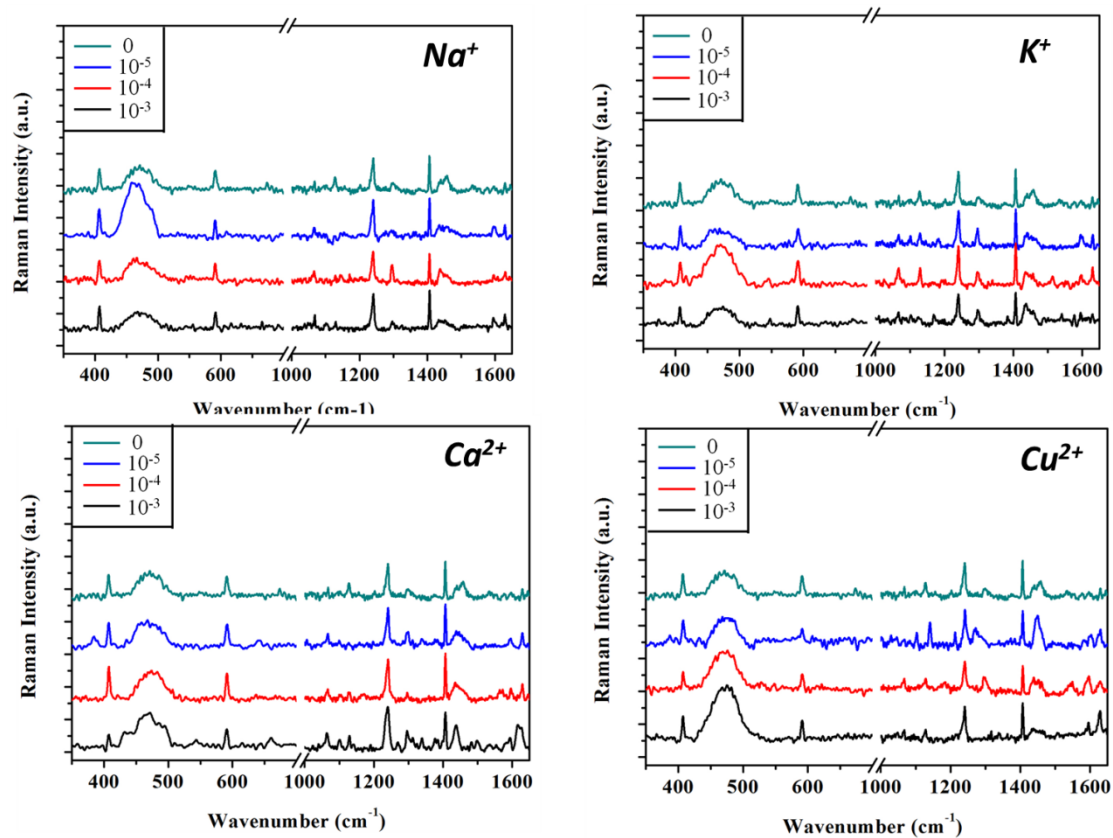

**Figure S7.** SERS spectra of pyrene molecules in the absence and presence of various kinds of metal ions with concentrations of 10<sup>-3</sup>, 10<sup>-4</sup> and 10<sup>-5</sup> M.

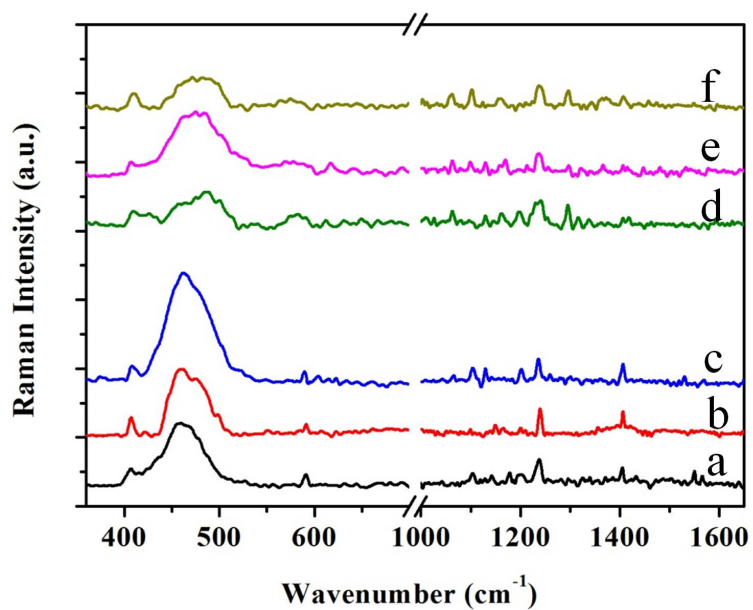

**Figure S8.** SERS spectra of pyrene molecules in the tap water with concentration of  $10^{-5}$  M. SERS spectra a, b, c and d, e, f show at different positions in sample 1 and sample 2, respectively.

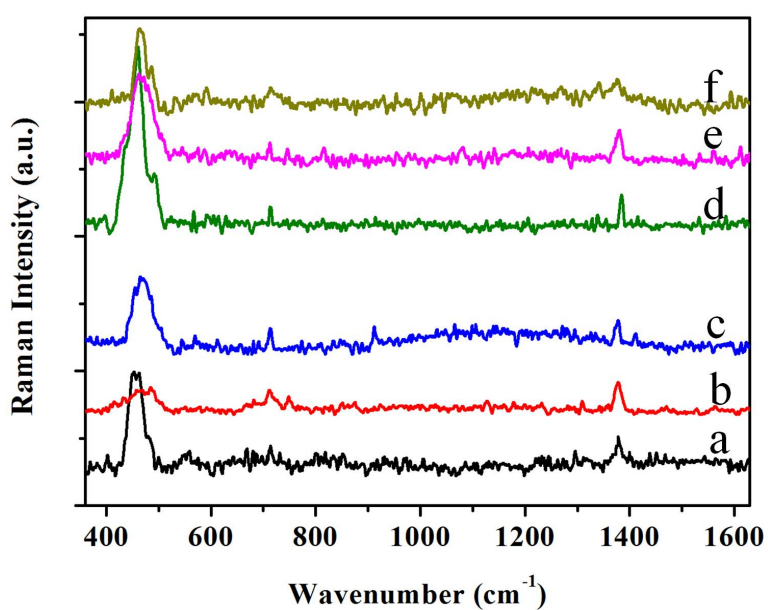

**Figure S9.** SERS spectra of 1-naphthol molecules in real environment (the tap water) with concentration of  $10^{-5}$  M. SERS spectra a, b, c and d, e, f show at different positions in sample 1 and sample 2, respectively.

|                            |                              |         |         |         |
|----------------------------|------------------------------|---------|---------|---------|
| Pyrene /10 <sup>-5</sup> M | Wavenumber /cm <sup>-1</sup> | 407     | 1240    | 1405    |
| Sample 1                   | AVG                          | 112.215 | 161.504 | 117.412 |
|                            | RSD                          | 3.10    | 0.98    | 2.03    |
|                            | Recovery percent             | 109.2%  | 98.0%   | 94.4%   |
| Sample 2                   | AVG                          | 106.552 | 156.092 | 92.760  |
|                            | RSD                          | 3.57    | 2.61    | 3.23    |
|                            | Recovery percent             | 115.0%  | 99.2%   | 101.2%  |

**Table S1.** The recovery percent of pyrene (10<sup>-5</sup> M) in the tap water. The average values and RSD come from three different detected positions randomly in each sample.

|                                |                             |        |         |
|--------------------------------|-----------------------------|--------|---------|
| 1-naphthol /10 <sup>-5</sup> M | Wavenumber/cm <sup>-1</sup> | 712    | 1385    |
| Sample 1                       | AVG                         | 75.741 | 97.826  |
|                                | RSD                         | 2.97   | 2.16    |
|                                | Recovery percent            | 98.4 % | 109.2 % |
| Sample 2                       | AVG                         | 77.010 | 103.571 |
|                                | RSD                         | 2.44   | 1.12    |
|                                | Recovery percent            | 97.4 % | 106.6 % |

**Table S2.** The recovery percent of 1-naphthol (10<sup>-5</sup> M) in the tap water. The average values and RSD come from three different detected positions randomly in each sample.
